# Supplementary material
Source: PubMed Central journal article supplement (PMC7610404)
Supplement: EMS118343-supplement-Figure_1_unprocessed_blots.pdf [file EMS118343-supplement-Figure_1_unprocessed_blots.pdf]

# Full unedited blot for Figure 1a

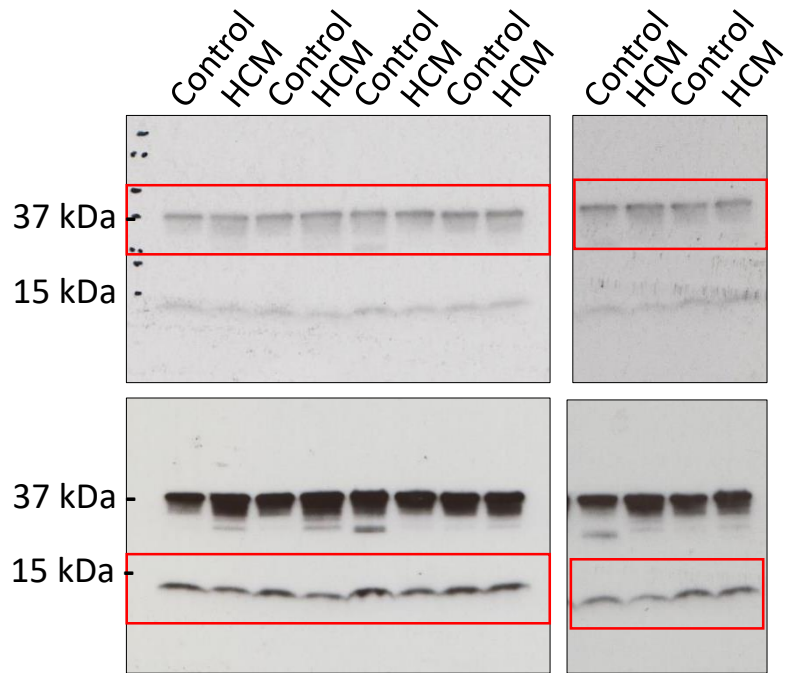

**IB:GAPDH/MPC1**

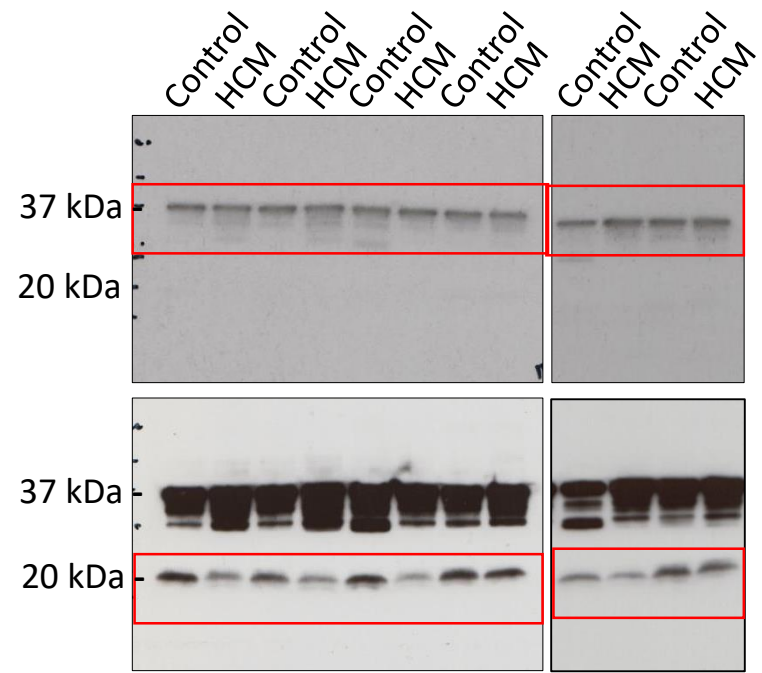

**IB:GAPDH/MPC2**

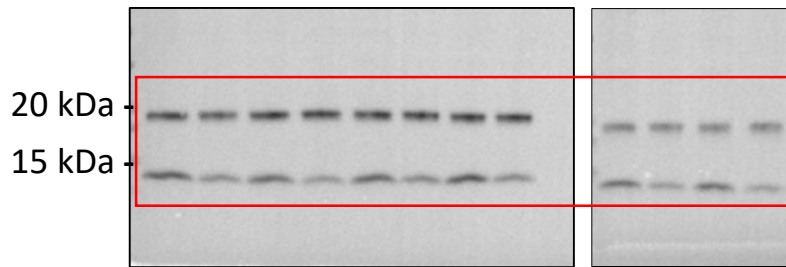

**IB:TOM20/MPC1**

# Full unedited blot for Figure 1b

## Angiotensin II 3 DAYS

Saline 1  
Ang II 1  
Saline 2  
Ang II 2  
Saline 3  
Ang II 3  
Saline 4  
Ang II 4  
Saline 5  
Ang II 5  
Saline 6  
Ang II 6

Saline 1  
Ang II 1  
Saline 2  
Ang II 2  
Saline 3  
Ang II 3  
Saline 4  
Ang II 4  
Saline 5  
Ang II 5  
Saline 6  
Ang II 6

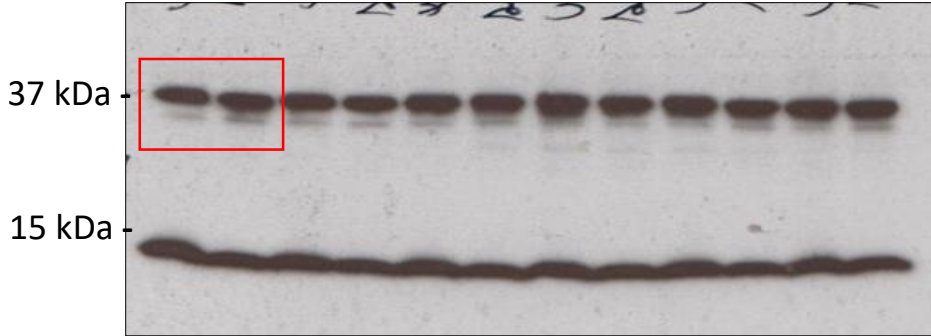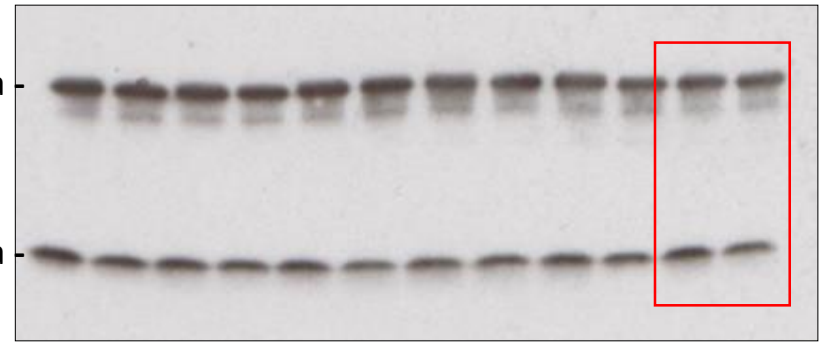

**IB: GAPDH/MPC2**

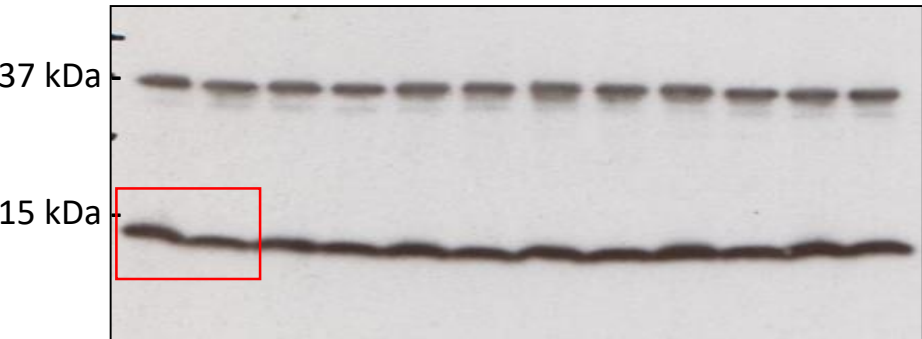

**IB:GAPDH/MPC1**

# Full unedited blot for Figure 1b

## Angiotensin II 14 DAYS

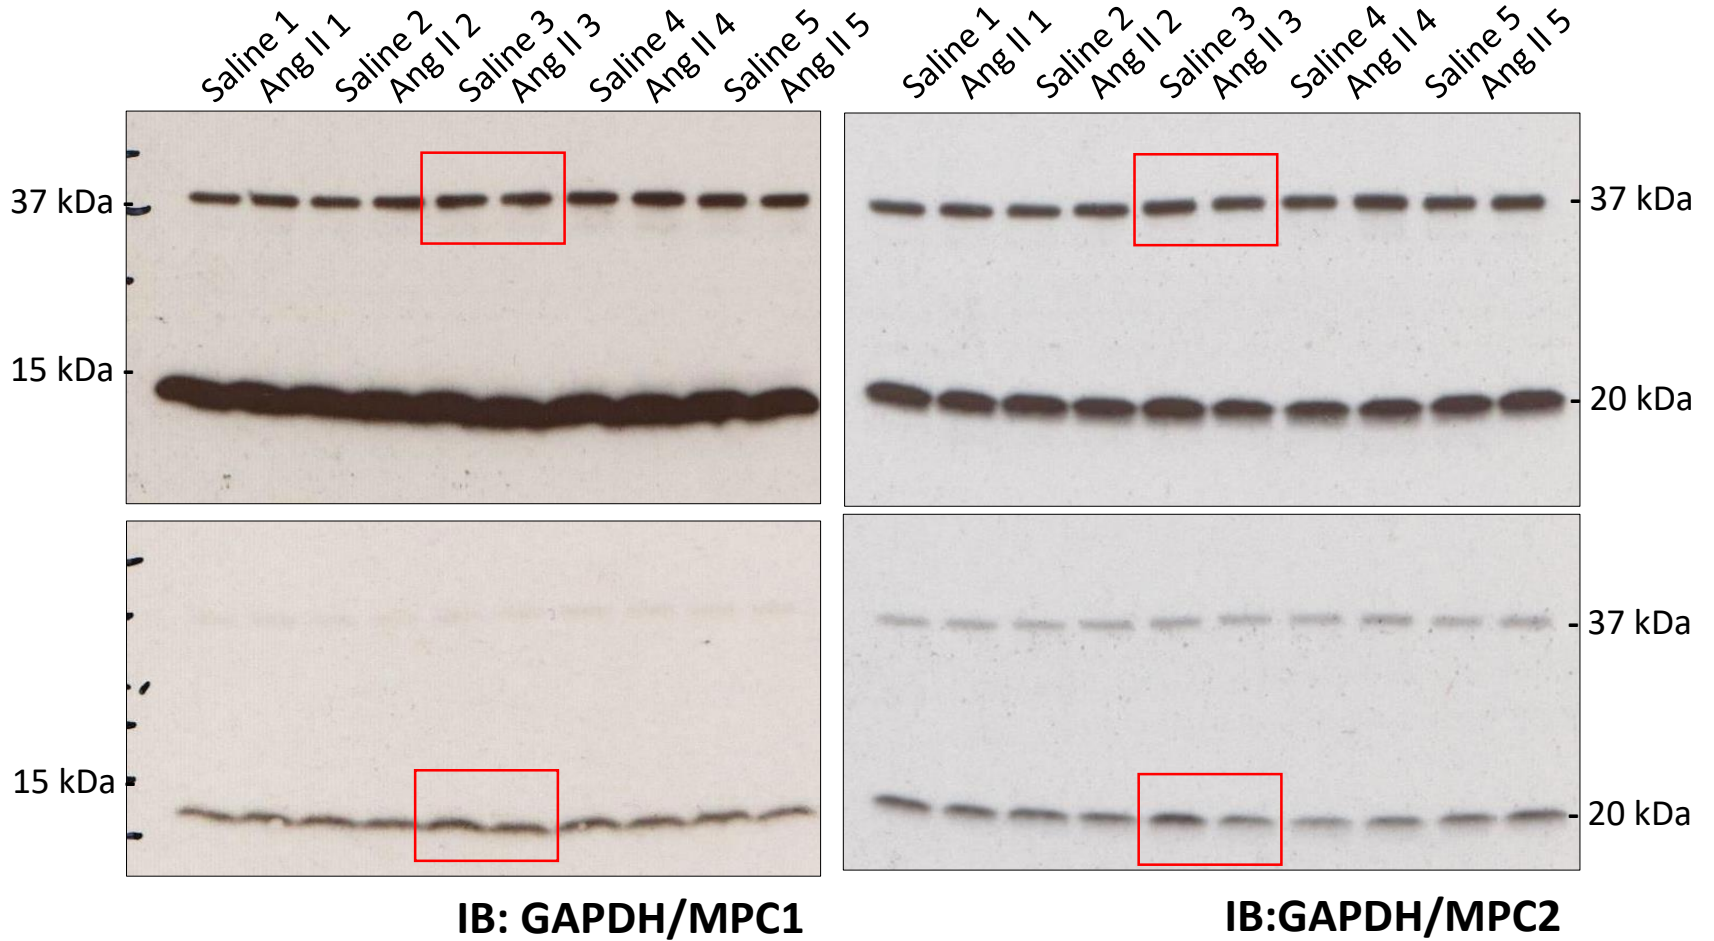

# Full unedited blot for Figure 1c

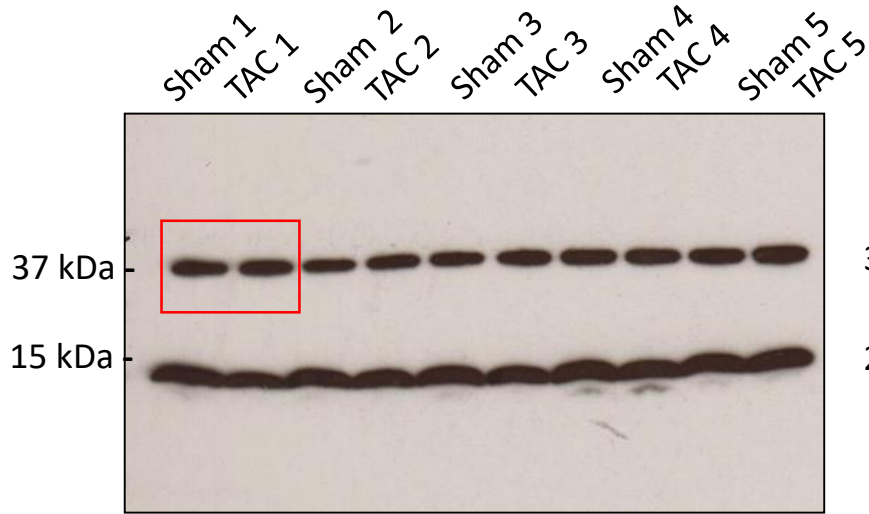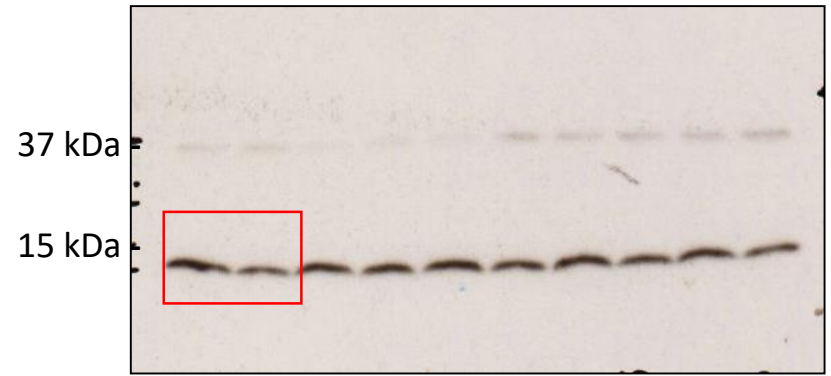

**IB:GAPDH/MPC1**

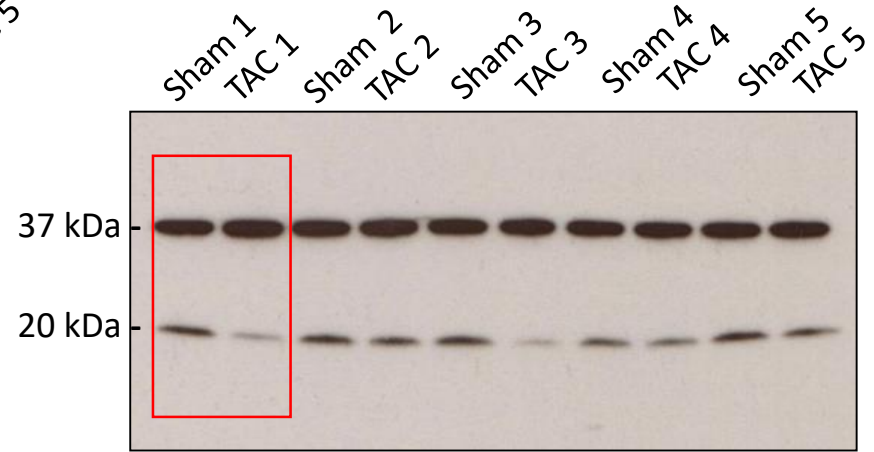

**IB: GAPDH/MPC2**
