# Supplementary material
Source: PubMed Central journal article supplement (PMC7610404)

### Full unedited blot for Figure 2a

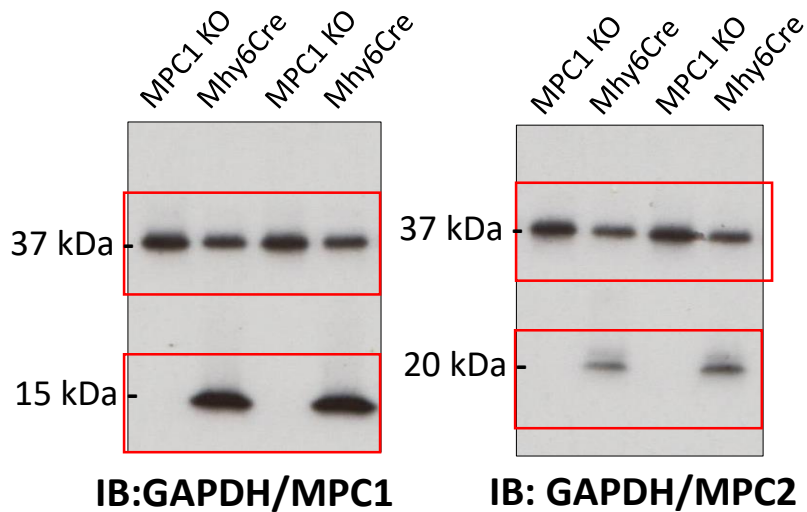

### Full unedited blot for Figure 2b

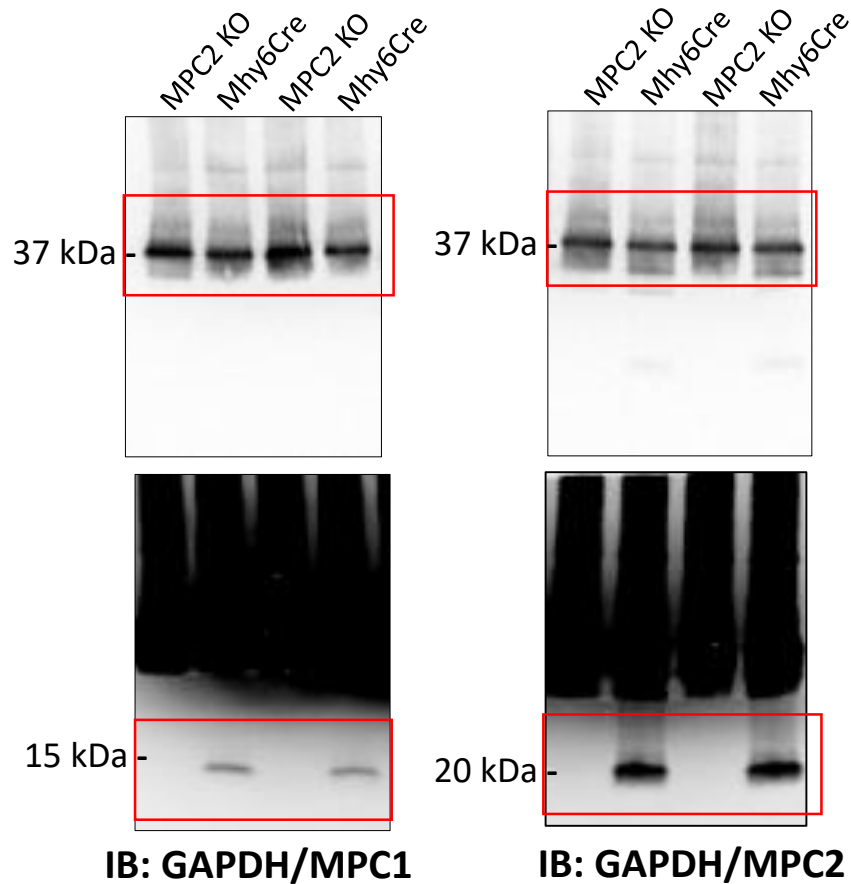

Mb was cut to incubate with MPC1/2 and GAPDH antibodies separately →

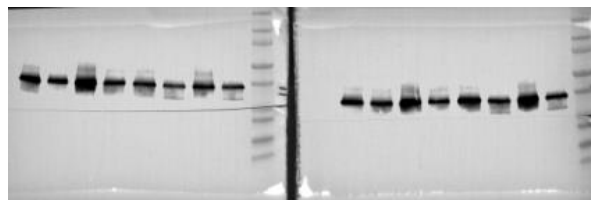

# Full unedited blot for Figure 2e

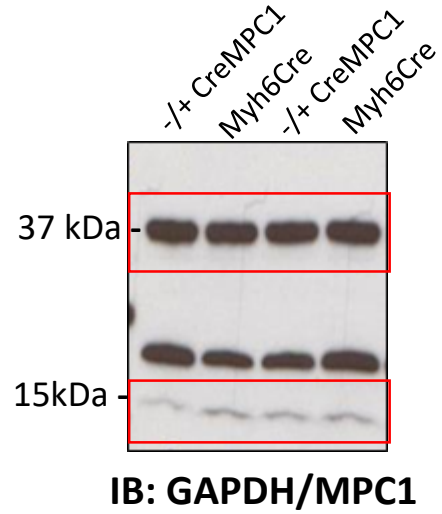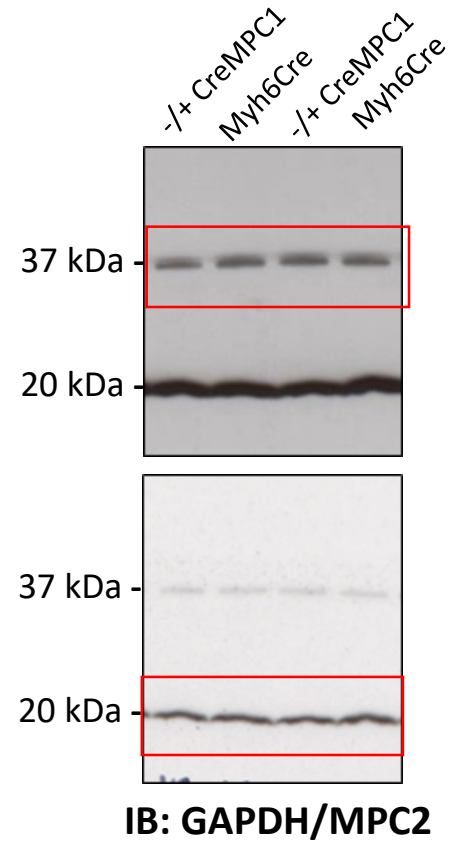

Supplement: EMS118343-supplement-Figure_2_unprocessed_blots.pdf [file EMS118343-supplement-Figure_2_unprocessed_blots.pdf]
