# Supplementary material
Source: PubMed Central journal article supplement (PMC7610404)

### Full unedited blot for Figure S3

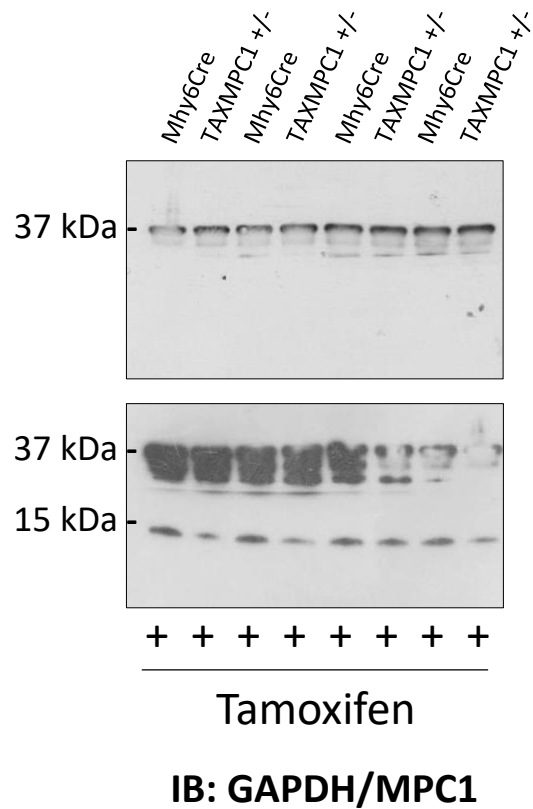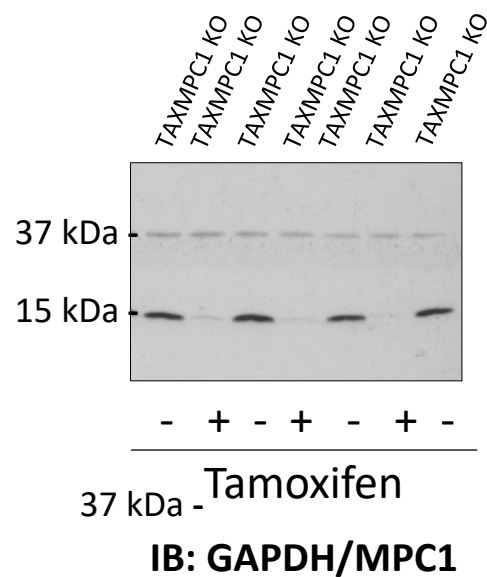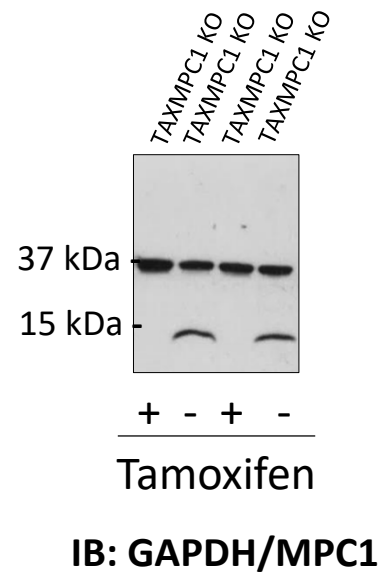

# Full unedited blot for Figure S3

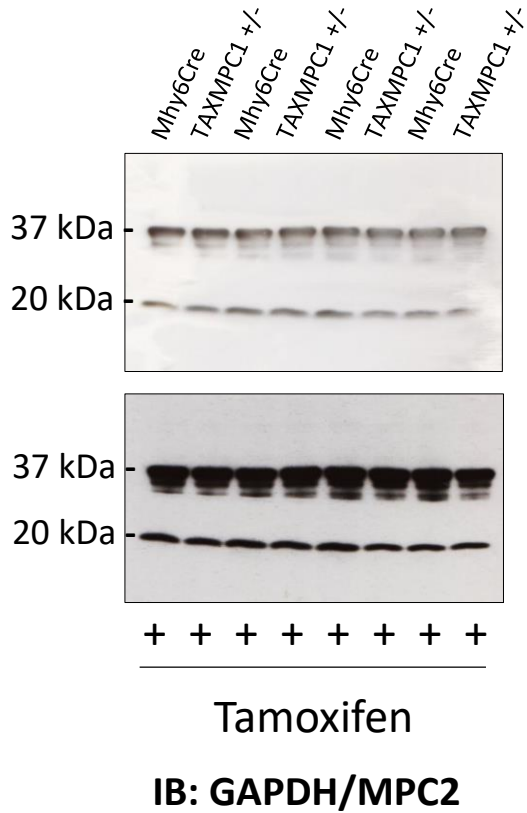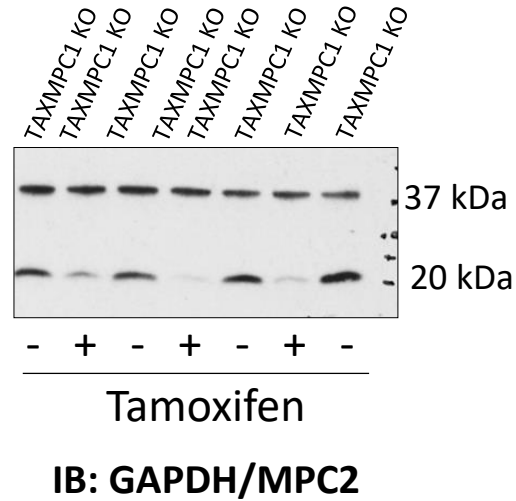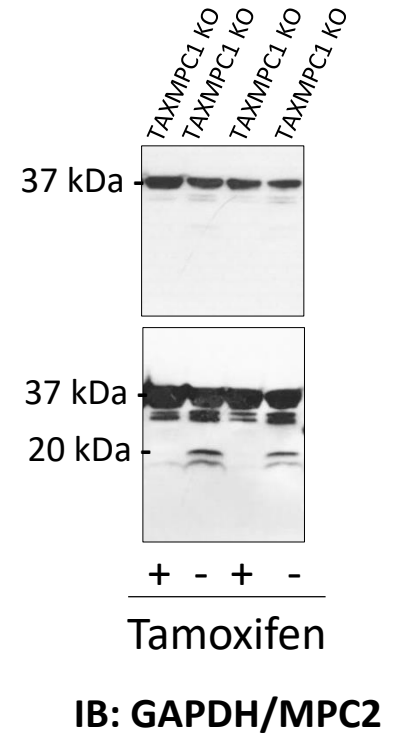

Supplement: EMS118343-supplement-Extended_Data_Figure_3_unprocessed_blots.pdf [file EMS118343-supplement-Extended_Data_Figure_3_unprocessed_blots.pdf]

### Full unedited blot for Figure 3b

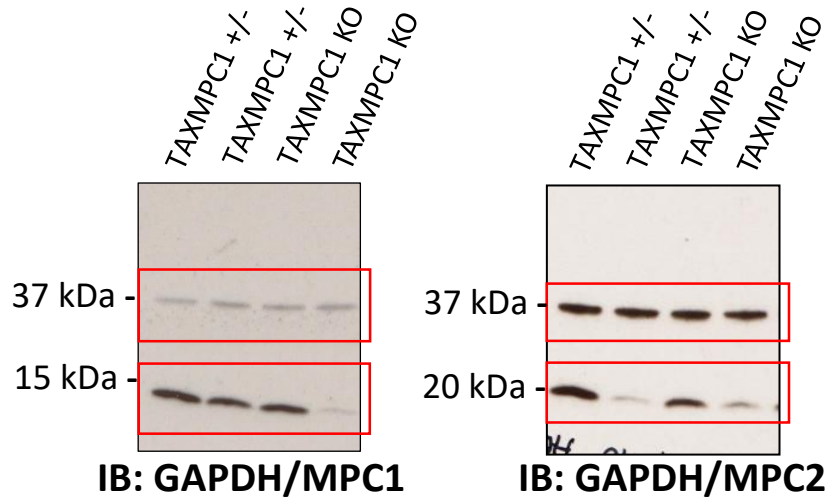

### Full unedited blot for Figure 3c

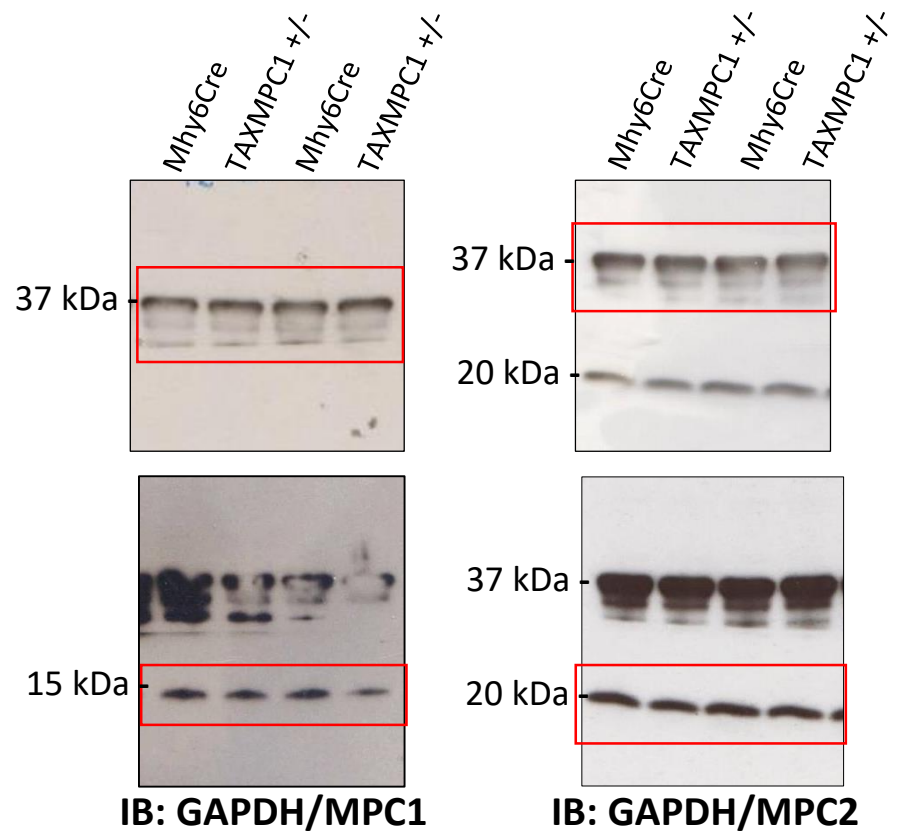

Supplement: EMS118343-supplement-Figure_3_unprocessed_blots.pdf [file EMS118343-supplement-Figure_3_unprocessed_blots.pdf]

# Full unedited blot for Figure 4b

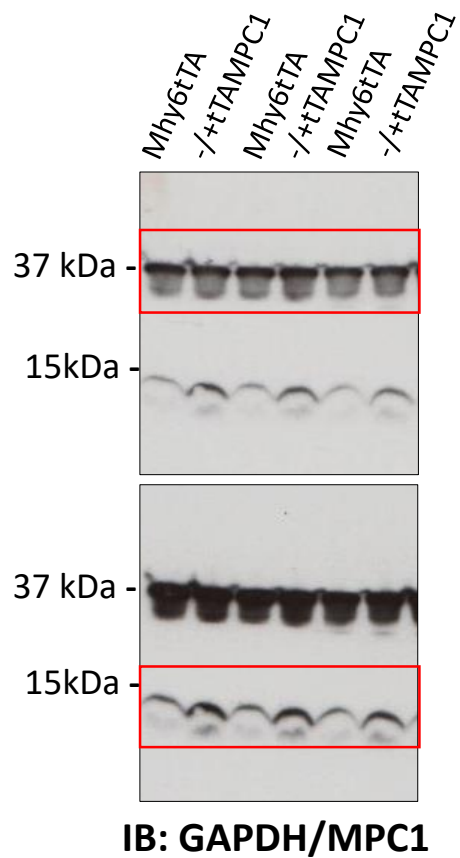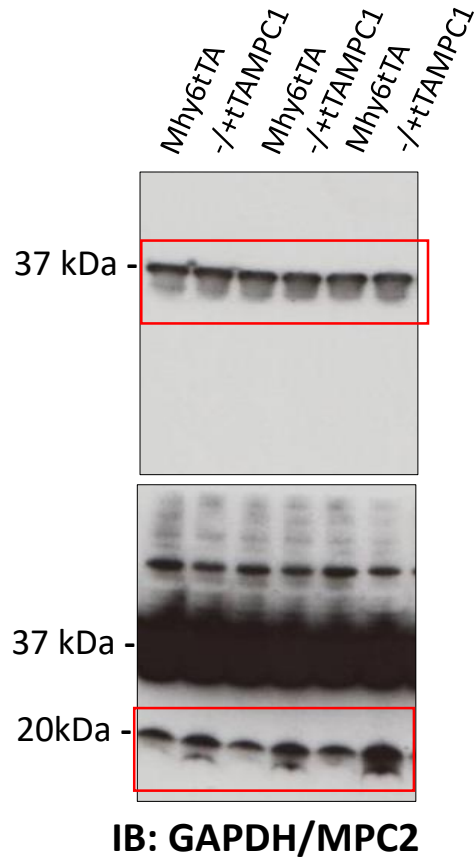

Supplement: EMS118343-supplement-Figure_4_unprocessed_blots.pdf [file EMS118343-supplement-Figure_4_unprocessed_blots.pdf]
